# Supplementary material for: Passive redirection filters minimize red blood cell contamination during neutrophil chemotaxis assays using whole blood
Source: Royal Society of Chemistry journal article supplement (doi:10.1039/d2lc00903j), 2023-01-01
Supplement: d2lc00903j1.pdf [file d2lc00903j1.pdf]

**Movie S1. Example of neutrophil recruitment using Passive Redirection Filter Design 4.**

Movie shows timelapse imaging of neutrophil recruitment in PRF design 4. Actively migrating cells neutrophils are visualized using Hoechst to stain the nucleus. During the 2 hours shown here, 8 neutrophils are recruited to the assay field located out of frame above the field of view, while 6 red blood cells progress as far as the Stage 3 antechamber, but none enter the assay field above.
